# Supplementary material for: Thermodynamic studies of U(vi) complexation with glutardiamidoxime for sequestration of uranium from seawater
Source: Royal Society of Chemistry journal article supplement (doi:10.1039/c3dt32940b), 2013-01-01
Supplement: c3dt32940b.pdf [file c3dt32940b.pdf]

Electronic Supplemental Information:

Table S1. Crystal data and structure refinement for glutardiamidoxime (H<sub>2</sub>B)

|                                        |                                                              |                            |
|----------------------------------------|--------------------------------------------------------------|----------------------------|
| Identification code                    | H <sub>2</sub> B-H <sub>2</sub> O                            |                            |
| Chemical formula                       | C <sub>5</sub> H <sub>14</sub> N <sub>4</sub> O <sub>3</sub> |                            |
| Formula weight                         | 178.20                                                       |                            |
| Temperature                            | 100(2) K                                                     |                            |
| Radiation, wavelength                  | synchrotron, 0.77490 Å                                       |                            |
| Crystal system, space group            | triclinic, P $\bar{1}$                                       |                            |
| Unit cell parameters                   | a = 8.3203(9) Å                                              | $\alpha = 74.802(2)^\circ$ |
|                                        | b = 11.6780(13) Å                                            | $\beta = 89.821(2)^\circ$  |
|                                        | c = 18.750(2) Å                                              | $\gamma = 88.107(2)^\circ$ |
| Cell volume                            | 1757.1(3) Å <sup>3</sup>                                     |                            |
| Z                                      | 8                                                            |                            |
| Calculated density                     | 1.347 g/cm <sup>3</sup>                                      |                            |
| Absorption coefficient $\mu$           | 0.110 mm <sup>-1</sup>                                       |                            |
| F(000)                                 | 768                                                          |                            |
| Crystal colour and size                | colourless, 0.20 × 0.17 × 0.04 mm <sup>3</sup>               |                            |
| Reflections for cell refinement        | 9380 ( $\theta$ range 3.27 to 33.61°)                        |                            |
| Data collection method                 | Bruker APEX II CCD diffractometer                            |                            |
|                                        | $\omega$ rotation with narrow frames                         |                            |
| $\theta$ range for data collection     | 2.93 to 33.64°                                               |                            |
| Index ranges                           | h -11 to 11, k -15 to 16, l 0 to 26                          |                            |
| Completeness to $\theta = 30.00^\circ$ | 99.4 %                                                       |                            |
| Intensity decay                        | .%                                                           |                            |
| Reflections collected                  | 144482                                                       |                            |
| Independent reflections                | 10633 ( $R_{\text{int}} = 0.0409$ )                          |                            |
| Reflections with $F^2 > 2\sigma$       | 9808                                                         |                            |
| Absorption correction                  | semi-empirical from equivalents                              |                            |
| Min. and max. transmission             | 0.94 and 0.95                                                |                            |
| Structure solution                     | direct methods                                               |                            |
| Refinement method                      | Full-matrix least-squares on $F^2$                           |                            |
| Weighting parameters a, b              | 0.0622, 0.3971                                               |                            |
| Data / restraints / parameters         | 10633 / 0 / 560                                              |                            |
| Final R indices [ $F^2 > 2\sigma$ ]    | R1 = 0.0377, wR2 = 0.1034                                    |                            |
| R indices (all data)                   | R1 = 0.0407, wR2 = 0.1059                                    |                            |
| Goodness-of-fit on $F^2$               | 1.029                                                        |                            |
| Extinction coefficient                 | 0                                                            |                            |
| Largest and mean shift/su              | 0.001 and 0.000                                              |                            |
| Largest diff. peak and hole            | 0.491 and -0.252 e Å <sup>-3</sup>                           |                            |
